# Supplementary material
Source: PubMed Central journal article supplement (PMC2546782)
Supplement: supp_190_18_6258__1.pdf [file supp_190_18_6258__1.pdf]

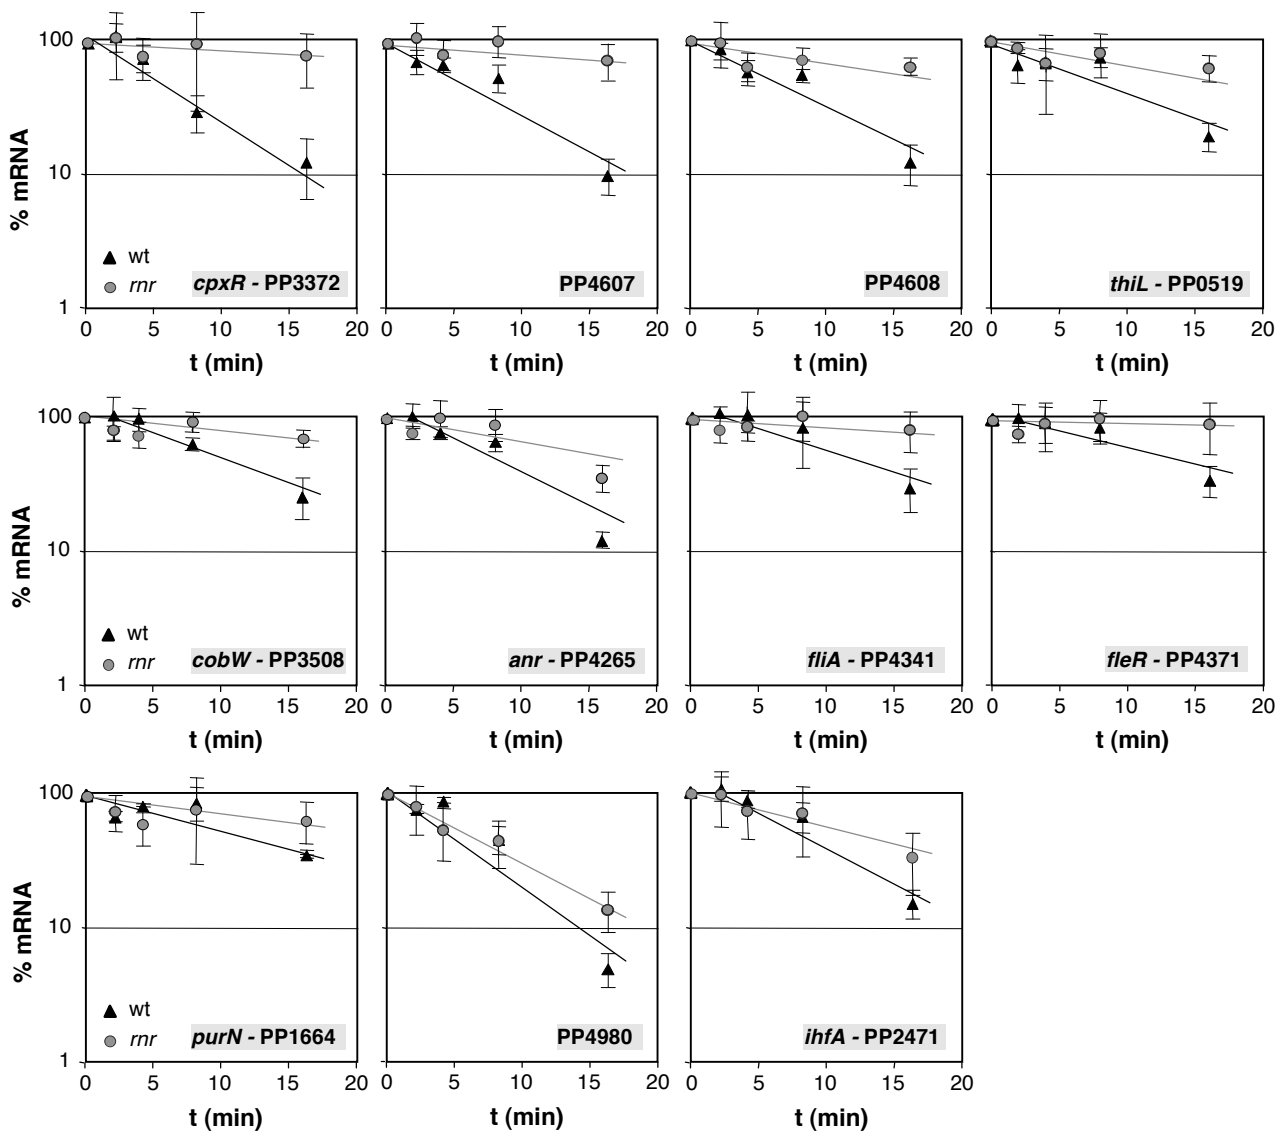

**Figure S1.** Effect of inactivating the *rnr* gene on the stability of selected mRNAs. Strains KT2440 (wild type) or KTRNR1 (an *rnr* derivative of KT2440) were cultivated in LB medium at 30°C. At a turbidity of 0.6, rifampicin was added to 100 mg/ml to inhibit transcription by RNA polymerase. At different time points, aliquots were taken and immediately frozen. Total RNA was purified and the amount of the indicated mRNAs was measured by real-time RT-PCR. Values indicate the decrease of the mRNA levels observed as a function of time after rifampicin addition (time 0) and correspond to the average of three independent assays; the standard error is shown.
