# Supplementary material
Source: PubMed Central journal article supplement (PMC2546782)
Supplement: supp_190_18_6258__4.pdf [file supp_190_18_6258__4.pdf]

1 **Table S3.** Genes upregulated or downregulated upon inactivation of the *P. putida rnr*  
2 genes, grouped in gene categories. Percentages are calculated relative to the  
3 total number of upregulated plus downregulated genes.  
4

| Gene category                                                    | Upregulated Genes |         | Downregulated Genes |         |
|------------------------------------------------------------------|-------------------|---------|---------------------|---------|
|                                                                  | Number            | Percent | Number              | Percent |
| Amino acid biosynthesis                                          | 6                 | 3       | 0                   | 0       |
| Biosynthesis of cofactors,<br>prosthetic groups, and<br>carriers | 19                | 9.5     | 2                   | 1       |
| Cell envelope                                                    | 6                 | 3       | 0                   | 0       |
| Central intermediary<br>metabolism                               | 1                 | 0.5     | 0                   | 0       |
| Cellular processes                                               | 16                | 8       | 2                   | 1       |
| DNA metabolism                                                   | 8                 | 4       | 1                   | 0.5     |
| Energy metabolism                                                | 12                | 6       | 4                   | 2       |
| Fatty acid and phospholipid<br>metabolism                        | 3                 | 1.5     | 1                   | 0.5     |
| Hypothetical protein                                             | 36                | 18      | 5                   | 2.5     |
| Other categories                                                 | 1                 | 0.5     | 1                   | 0.5     |
| Protein fate                                                     | 3                 | 1.5     | 1                   | 0.5     |
| Purines, pyrimidines,<br>nucleosides, and nucleotides            | 3                 | 1.5     | 0                   | 0       |
| Protein synthesis                                                | 7                 | 3.5     | 3                   | 1.5     |
| Regulatory functions                                             | 18                | 9       | 0                   | 0       |
| Signal transduction                                              | 0                 | 0       | 0                   | 0       |
| Transcription                                                    | 2                 | 1       | 1                   | 0.5     |
| Transport and binding proteins                                   | 16                | 8.0     | 6                   | 3       |
| Unknown function                                                 | 15                | 7.5     | 0                   | 0       |
| Total genes                                                      | 172               | 86.4    | 27                  | 13.6    |
